# Supplementary material
Source: PubMed Central journal article supplement (PMC6205731)
Supplement: NIHMS1500257-supplement-Acknowledgment_form.pdf [file NIHMS1500257-supplement-Acknowledgment_form.pdf]

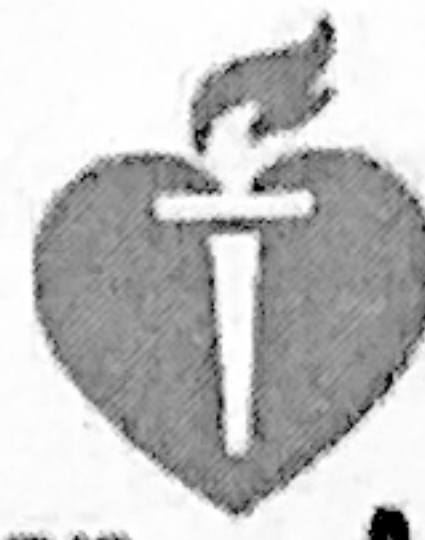

## Acknowledgment Permission Form

Journal STROKE

Manuscript Number STROKE/2018/021508R1

First Author Masaki Ito

Title of Work RNA sequencing analysis revealed a distinct motor cortex transcriptome in spontaneously-recovered mice after stroke

Authors must provide written permission/approval from all individuals mentioned by name in the Acknowledgments section of a submitted manuscript. By signing this form, any and all acknowledged persons therefore state that they have read and approved the mention of their names in the Acknowledgment section of the aforementioned paper.

| Name                                       | Signature       | Date              |
|--------------------------------------------|-----------------|-------------------|
| Name (1) <u>Brad Efron</u>                 | <u></u>         | <u>06.28.2018</u> |
| Name (2) <u>John S. Tamareisis</u>         | <u></u>         | <u>06.29.2018</u> |
| Name (3) <u>Balasubramanian Narasimhan</u> | <u></u>         | <u>06.29.2018</u> |
| Name (4) <u>Anika Kim</u>                  | <u></u>         | <u>06.30.2018</u> |
| Name (5) <u>Lorenzo Gonzalez</u>           | <u></u>         | <u>7/2/18</u>     |
| Name (6) <u>Tonya Bliss</u>                | <u></u>         | <u>7/3/18</u>     |
| Name (7) <u>Cindy H. Samos</u>             | <u></u>         | <u>7/5/18</u>     |
| Name (8) _____                             | Signature _____ | Date _____        |
| Name (9) _____                             | Signature _____ | Date _____        |
| Name (10) _____                            | Signature _____ | Date _____        |
| Name (11) _____                            | Signature _____ | Date _____        |
| Name (12) _____                            | Signature _____ | Date _____        |
| Name (13) _____                            | Signature _____ | Date _____        |
| Name (14) _____                            | Signature _____ | Date _____        |
| Name (15) _____                            | Signature _____ | Date _____        |
| Name (16) _____                            | Signature _____ | Date _____        |
| Name (17) _____                            | Signature _____ | Date _____        |
| Name (18) _____                            | Signature _____ | Date _____        |
| Name (19) _____                            | Signature _____ | Date _____        |
| Name (20) _____                            | Signature _____ | Date _____        |
