# Supplementary material
Source: PubMed Central journal article supplement (PMC6205731)
Supplement: NIHMS1500257-supplement-Change_of_Authorship_form.pdf [file NIHMS1500257-supplement-Change_of_Authorship_form.pdf]

# Change of Authorship Form

(Must be completed and signed by ALL authors)

Please check all that apply

New author(s) have been added (in addition to this form, all new authors must complete the copyright transfer agreement and conflict of interest disclosure.

Change in order of authorship.

An author wishes to remove his/her name. An author's name may only be removed his/her own request and a letter signed by the author should accompany this form

Manuscript Number STROKE/2018/021508R1

RNA sequencing analysis revealed a distinct motor cortex transcriptome in

Manuscript Title spontaneously-recovered mice after stroke

## Former Authorship

Please list ALL AUTHORS in the same order as the original submission. For more than 12, use an extra sheet.

### Print Name

Name (1) Masaki Ito  
Name (2) Markus Aswendt  
Name (3) Alex G. Lee  
Name (4) Shunsuke Ishizaka  
Name (5) Zhijuan Cao  
Name (6) Eric H. Wang

### Print Name

Name (7) Sabrina L. Levy  
Name (8) Daniel L. Smerin  
Name (9) Jennifer A. McNab  
Name (10) Michael Zeineh  
Name (11) Christoph Leuze  
Name (12) Maged Goubran  
Name (13) Michelle Y. Cheng  
Name (14) Gary K. Steinberg

## New Authorship

All authors must sign below agreeing to the changes in authorship. The authorship order must reflect the authorship order of the manuscript.

|                                    |                                  |                       |
|------------------------------------|----------------------------------|-----------------------|
| Name (1) <u>Masaki Ito</u>         | Signature <u>Masaki Ito</u>      | Date <u>4/28/2018</u> |
| Name (2) <u>Markus Aswendt</u>     | Signature <u>M. Aswendt</u>      | Date <u>4/30/18</u>   |
| Name (3) <u>Alex G. Lee</u>        | Signature <u>Alex G. Lee</u>     | Date <u>4-26-2018</u> |
| Name (4) <u>Shunsuke Ishizaka</u>  | Signature <u>S. Ishizaka</u>     | Date <u>4/30/18</u>   |
| Name (5) <u>Zhijuan Cao</u>        | Signature <u>Z. Cao</u>          | Date <u>4/23/18</u>   |
| Name (6) <u>Eric H. Wang</u>       | Signature <u>E. Wang</u>         | Date <u>4/30/18</u>   |
| Name (7) <u>Sabrina L. Levy</u>    | Signature <u>Sabrina L. Levy</u> | Date <u>4/30/18</u>   |
| Name (8) <u>Daniel L. Smerin</u>   | Signature <u>D. Smerin</u>       | Date <u>4/30/18</u>   |
| Name (9) <u>Jennifer A. McNab</u>  | Signature <u>J. McNab</u>        | Date <u>4/24/18</u>   |
| Name (10) <u>Michael Zeineh</u>    | Signature <u>M. Zeineh</u>       | Date <u>4/24/18</u>   |
| Name (11) <u>Christoph Leuze</u>   | Signature <u>C. Leuze</u>        | Date <u>4/24/18</u>   |
| Name (12) <u>Maged Goubran</u>     | Signature <u>M. Goubran</u>      | Date <u>4/30/18</u>   |
| Name (13) <u>Michelle Y. Cheng</u> | Signature <u>M. Cheng</u>        | Date <u>4/23/18</u>   |
| Name (14) <u>Gary K. Steinberg</u> | Signature <u>G. Steinberg</u>    | Date <u>4/26/18</u>   |

Please scan and email to [stroke@strokeahajournal.org](mailto:stroke@strokeahajournal.org).
